# Supplementary material for: Hydrodynamic Trails Produced by Daphnia: Size and Energetics
Source: PubMed Central journal article supplement (PMC3966788; doi:10.1371/journal.pone.0092383), 2014-03-26
Supplement: pone.0092383.s002.pdf [file pone.0092383.s002.pdf]

| <b>Age (days)</b> | <b>Incoming-outgoing angle difference (°)</b> |                              |                     |
|-------------------|-----------------------------------------------|------------------------------|---------------------|
|                   | <b>Cruising</b>                               | <b>Hopping &amp; sinking</b> | <b>Looping</b>      |
| 5                 | 3.02 ( $\pm 3.0$ )                            | 22.44 ( $\pm 15.4$ )         | 8.34 ( $\pm 5.9$ )  |
| 20                | 7.45 ( $\pm 1.7$ )                            | 3.36 ( $\pm 2.2$ )           | 13.14 ( $\pm 6.8$ ) |
| 35                | 1.90 ( $\pm 1.3$ )                            | 8.18 ( $\pm 3.0$ )           | 11.32 ( $\pm 6.8$ ) |
